# Supplementary material
Source: PubMed Central journal article supplement (PMC4178664)
Supplement: AEM.01600-14_zam999105665so1.pdf [file AEM.01600-14_zam999105665so1.pdf]

Supporting Material for

## **Carbohydrate-coating reduces adhesion of biofilm forming *Bacillus subtilis* to gold surfaces**

S. Kesel<sup>1</sup>, A. Mader<sup>1</sup>, P.H. Seeberger<sup>2</sup>, O. Lieleg<sup>3</sup> and M. Opitz<sup>1\*</sup>

1 Center for NanoScience, Faculty of Physics, Ludwig-Maximilians-Universität München, Geschwister-Scholl-Platz 1, D-80539 Munich, Germany.

2 Max Planck Institute of Colloids and Interfaces, Department of Biomolecular Systems, Arnimallee 22, 14195 Berlin, Germany and Freie Universität Berlin, Institute for Chemistry and Biochemistry, Arnimallee 22, 14195 Berlin, Germany

3 Institute for Medical Engineering IMETUM and Department for Medical Engineering, Technische Universität München, Boltzmannstrasse 11, 85748 Garching, Germany

\* corresponding author: [Opitz@physik.uni-muenchen.de](mailto:Opitz@physik.uni-muenchen.de)

### **Supporting Tables:**

**Supporting Table 1: Maximal deflection of the wild-type and mutant strains used in this study as obtained for bacterial adhesion to gold cantilevers as given in Figure 2.** The error is given by the standard deviation.

| <b>Strain</b> | <b>Maximal Deflection [nm]</b> |
|---------------|--------------------------------|
| NCIB 3610     | 270 ± 30                       |
| CA017         | 370 ± 30                       |
| N24           | 290 ± 30                       |
| ZK3660        | 700 ± 90                       |

**Supporting Table 2: Maximal deflection normalized to the values of bacterial adhesion to gold cantilevers as presented in Figure 3.** Details on strain description can be found in **Table 1**. The error is given by the standard deviation.

| <b>Carbohydrate</b> | <b>NCIB 3610</b> | <b>CA017</b> | <b>N24</b>  | <b>ZK3660</b> | <b>BD630</b> |
|---------------------|------------------|--------------|-------------|---------------|--------------|
| Galactose           | 0.89 ± 0.15      | 0.92 ± 0.11  | 0.83 ± 0.12 | 0.58 ± 0.12   | 0.60 ± 0.12  |
| Mannose             | 0.68 ± 0.08      | 0.83 ± 0.09  | 0.85 ± 0.09 | 0.59 ± 0.11   | 0.59 ± 0.10  |
| Lactose             | 0.75 ± 0.13      | 0.78 ± 0.08  | 0.87 ± 0.07 | 0.52 ± 0.10   | 0.62 ± 0.08  |
| Gold                | 1.00 ± 0.08      | 1.00 ± 0.08  | 1.00 ± 0.06 | 1.00 ± 0.13   | 1.00 ± 0.09  |
